# Supplementary material for: The Development of Intensive Care Unit Acquired Hypernatremia Is Not Explained by Sodium Overload or Water Deficit: A Retrospective Cohort Study on Water Balance and Sodium Handling
Source: Crit Care Res Pract. 2016 Sep 14;2016:9571583. doi: 10.1155/2016/9571583 (PMC5040124; doi:10.1155/2016/9571583)
Supplement: Supplementary file 1 — With a cut-off value of 145 mmol/L for IAH variables concerning severity of illness remained significantly different between groups, with patients that developed IAH as the more severe I'll group. Sodium intake after 48 hours reached a significant difference, however still with high amounts of sodium intake in both groups. [file 9571583.f1.doc]

**Supplemental material**

|  | **s[Na] < 145mmol/l** | **s[Na] ≥ 145mmol/l** | **P-value** |
| --- | --- | --- | --- |
| Number of patients, n (%)  Male gender, n (%)  Age, years  APACHE IV  SOFA-score  Reason for admission, n (%)  Cardiovascular surgery  Sepsis  Elective surgery  Emergency surgery  Cardiopulmonary resuscitation  Miscellaneous  Serum sodium on admission, mmol/l  Serum creatinine on admission, µmol/l  Serum urea on admission, mmol/l | 66 (68)  42 (64)  66 [61-73]  59 [47-78]  6 [4-6]  30 (45)  6 (9)  4 (6)  13 (20)  8 (12)  5 (8)  138 [136-140]  92 [71-113]  7 [5-7] | 31 (32)  21 (68)  66 [57-77]  75 [60-98]  8 [5-10]  9 (29)  5 (16)  1 (3)  2 (7)  4 (13)  10 (32)  138 [135-140]  81 [67-122]  6 [4-8] | 0.82  0.93  0.02  0.03  0.02  0.85  0.68  0.61 |

**Table I:** Baseline characteristics, balance study. APACHE Acute Physiology And Chronic Health evaluation, SOFA Sequential Organ Failure Assessment. Data are presented as median [IQR] or as absolute numbers (%).

|  | **s[Na] < 145mmol/l** | **s[Na] ≥ 145mmol/l** | **P-value** |
| --- | --- | --- | --- |
| Length of stay, days  SOFA-score after 24 hours  SOFA-score after 48 hours  Fluid balance after 24 hours, L1  Fluid balance after 48 hours, L1  Administered sodium after 24 hours,   grams  Administered sodium after 48 hours,   grams  Serum creatinine after 24 hours, µmol/l  Serum creatinine after 48 hours, µmol/l  Serum urea after 24 hours, mmol/l  Serum urea after 48 hours, mmol/l  No of patients on furosemide after 24h  Total dose furosemide after 24h, mg  No of patients on furosemide after 48 h  Total dose furosemide after 48h, mg | 4 [3-5]  6 [4-8]  5 [3-7]  1.9 [0.9-2.8]  2.4 [1-3.7]  9.3 [6.8-12.1]  12.5 [9.2-17.7]  84 [66-115]  76 [59-112]  8 [6-9]  8 [6-12]  5 (8)  20 [20-60]  21 (32)  40 [20-60] | 10 [6-20]  8 [6-10]  8 [5-11]  1.9 [0.5-3.7]  2.6 [0.2-4.9]  11.6 [5.7-15.9]  15.9 [9.8-23.1]  94 [68-130]  85 [61-147]  8 [5-11]  9 [7-14]  4 (13)  60 [25-395]  12 (39)  50 [20-75] | 0.00  0.00  0.00  0.96  0.99  0.26  0.03  0.52  0.34  0.74  0.20  0.46  0.29  0.50  0.31 |

**Table II:** Results of investigated parameters, balance study. 1. Fluid balances are as extracted from the PDMS, minus 500ml of expected insensible loss per day of admission.
